# Supplementary material for: Seasonal Variability of the Airborne Eukaryotic Community Structure at a Coastal Site of the Central Mediterranean
Source: MDPI journal article supplement (doi:10.3390/toxins13080518), 2021-07-24
Supplement: s1 [file s1]

# Supplementary Materials: Seasonal Variability of the Airborne Eukaryotic Community Structure at a Coastal Site of the Central Mediterranean

Mattia Fragola, Maria Rita Perrone, Pietro Alifano, Adelfia Talà and Salvatore Romano

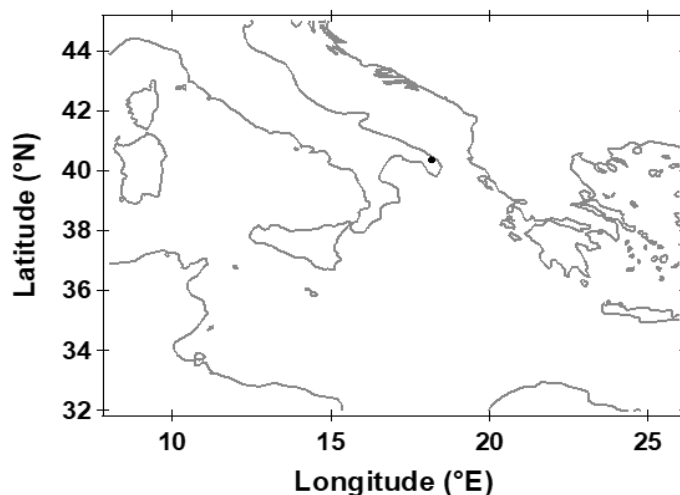

**Figure S1.** Geographical location of the monitoring site at the Mathematics and Physics Department of the University of Salento in Lecce, Italy (black dot) in the Central Mediterranean Basin.

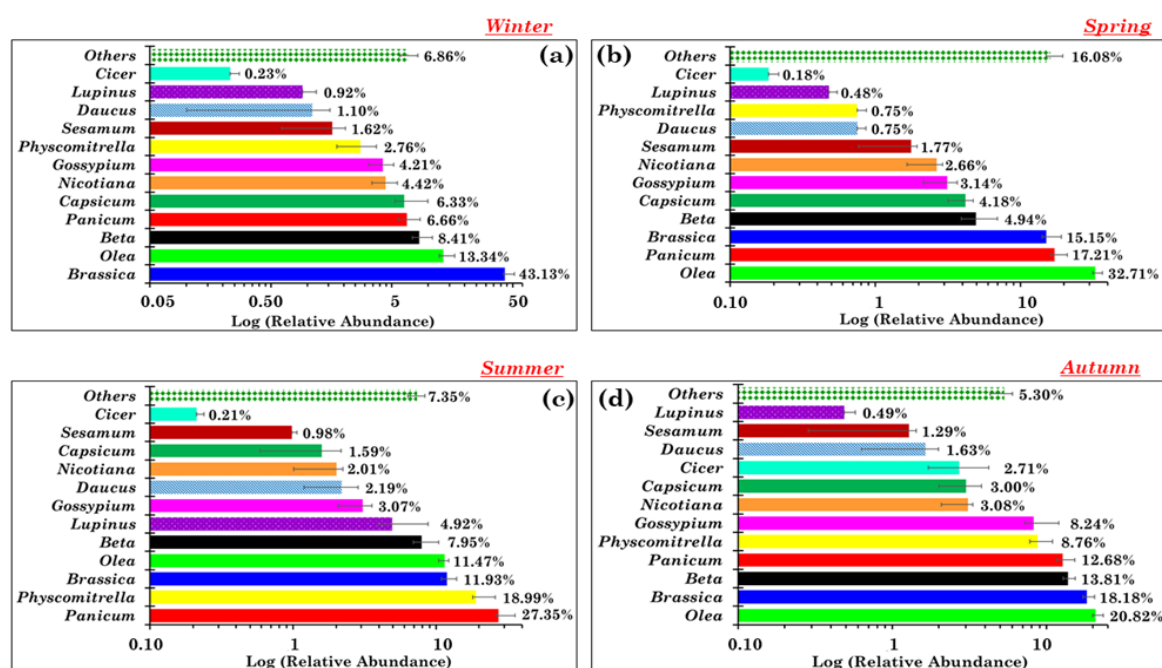

**Figure S2.** Mean percentage contribution (on a logarithmic scale) of the 12 most abundant and pervasive Streptophyta genera ( $\geq 1.17\%$  mean within-sample relative abundance) in (a) winter, (b) spring, (c) summer and (d) autumn samples. The error bars represent the standard error of the mean. The  $< 1.17\%$  mean within-sample relative abundance genera, in addition to the not-pervasive high-RA ones, are grouped as "Others".

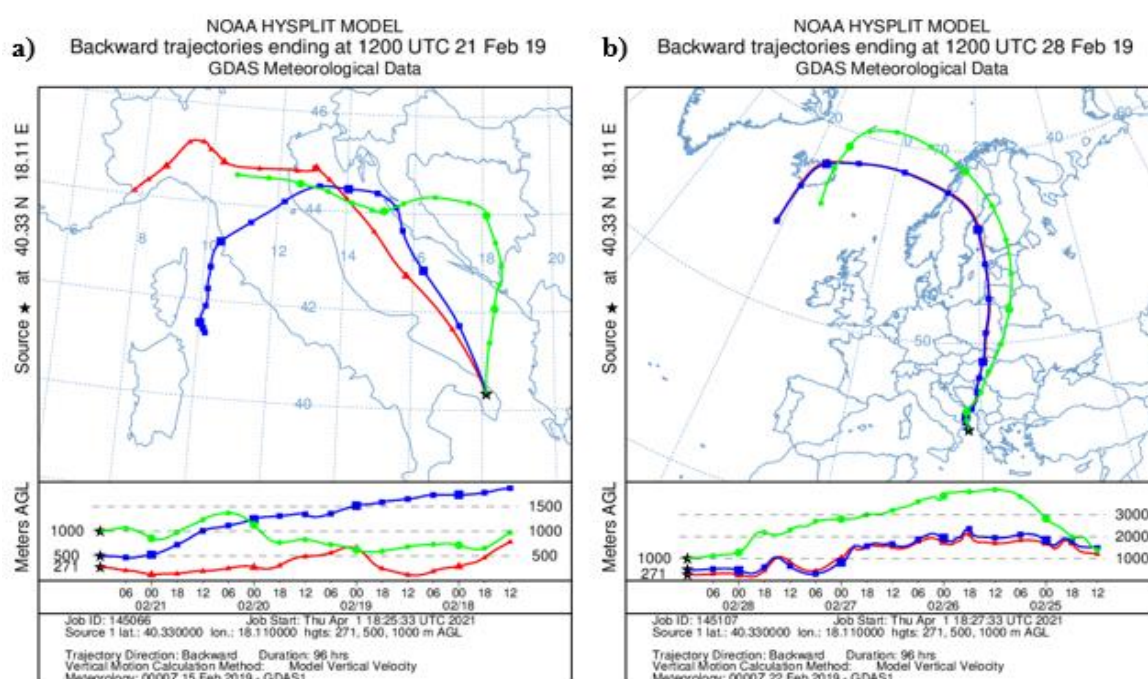

**Figure S3.** Four-day analytical back-trajectories that reached the study site at 271, 500, and 1000 m AGL, at 12:00 UTC on February (a) 21 and (b) 28, 2019, when 24-hour samples S7 and S8 were collected, respectively.

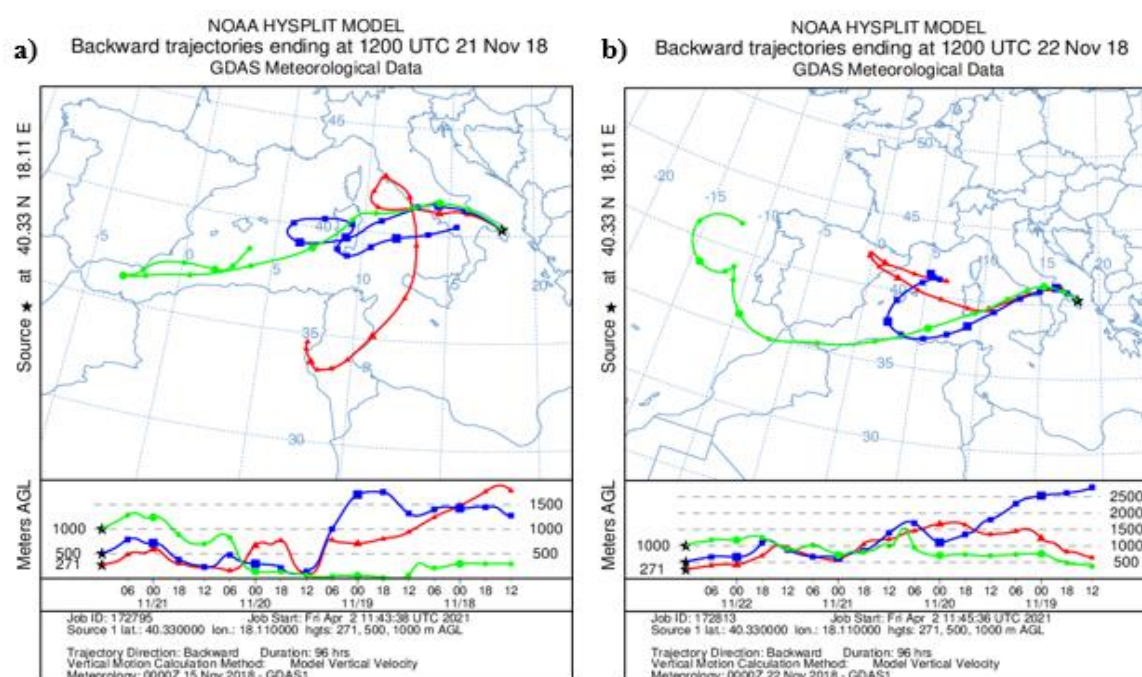

**Figure S4.** Four-day analytical back-trajectories that reached the study site at 271, 500, and 1000 m AGL, at 12:00 UTC on November (a) 21 and (b) 22, 2018, when 48-hour samples S28 and S29 were collected, respectively.

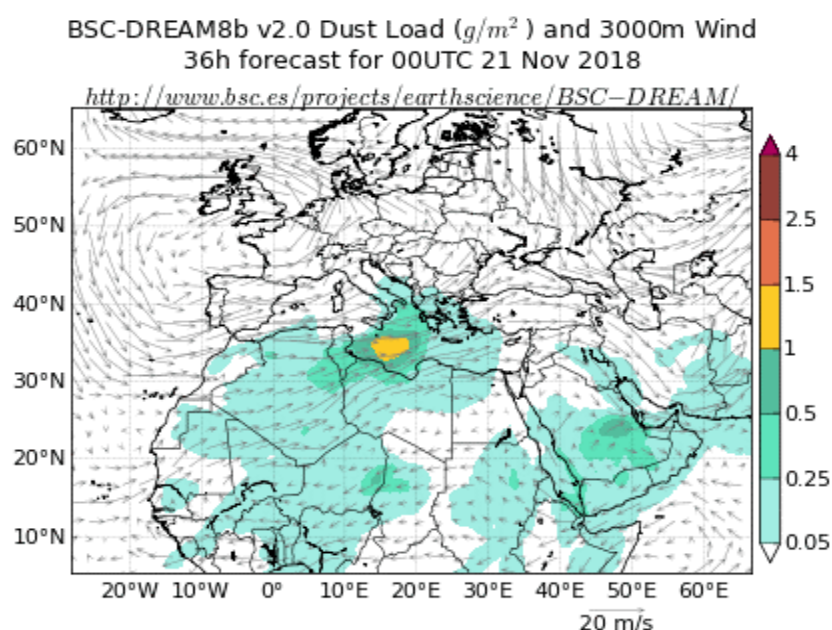

**Figure S5.** Dust load map from the BSC-DREAM8b model in the Central Mediterranean basin at 00:00 UTC on November 21, 2018, when 48-hour sample S28 was collected.

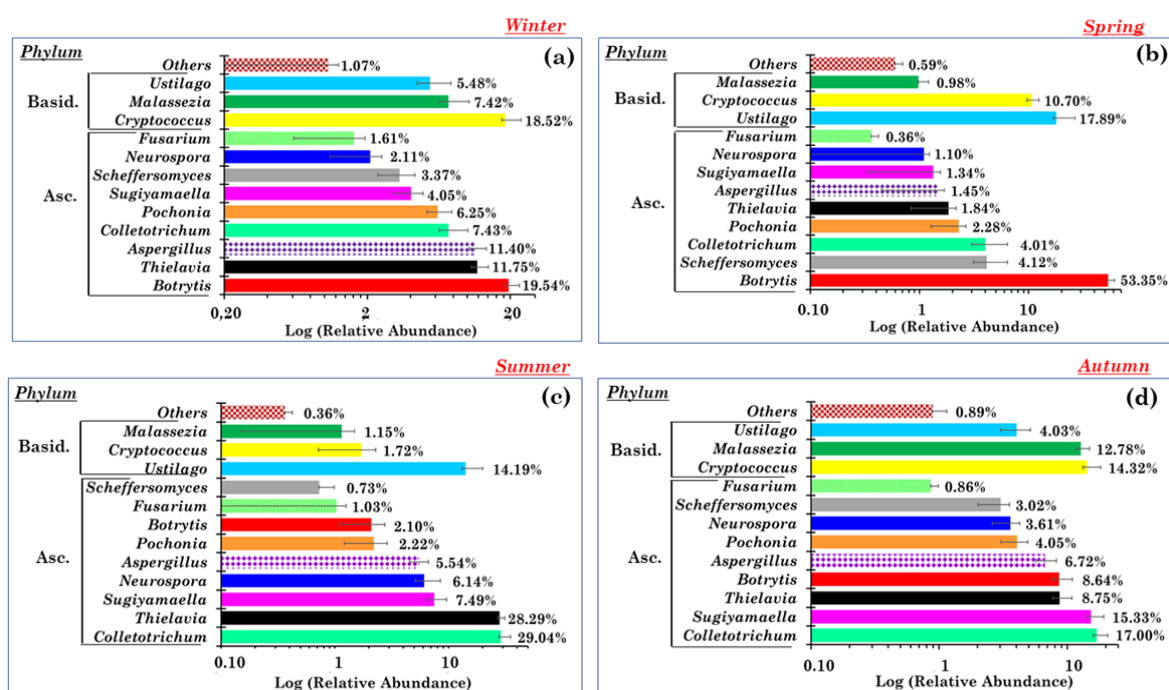

**Figure S6.** Mean percentage contribution (on a logarithmic scale) of the 12 most abundant and pervasive Ascomycota-Basidiomycota genera ( $\geq 0.95\%$  mean within-sample relative abundance) in (a) winter, (b) spring, (c) summer and (d) autumn samples. The error bars represent the standard error of the mean. The  $<0.95\%$  mean within-sample relative abundance genera, in addition to the not-pervasive high-RA ones, are grouped as “Others”. Phyla related to each genus are also reported on the left (Basid.: Basidiomycota, Asc.: Ascomycota).

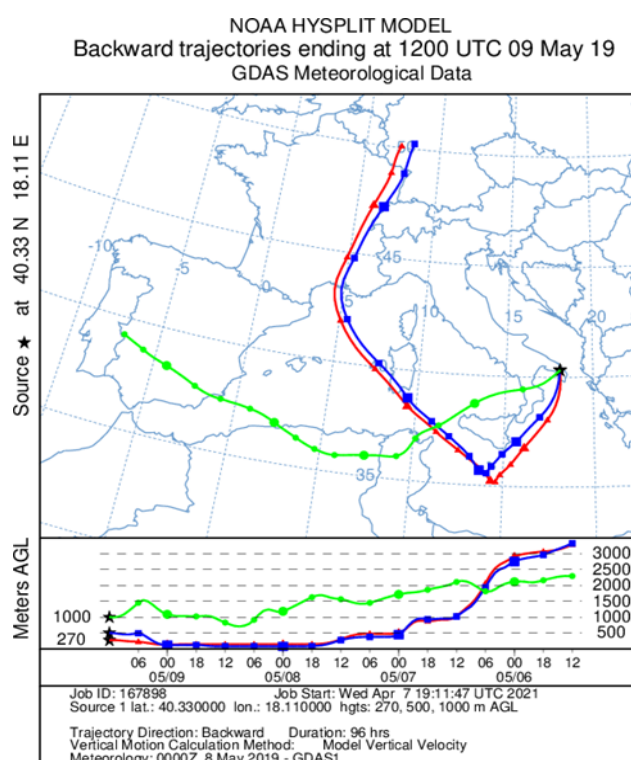

**Figure S7.** Four-day analytical back-trajectories that reached the study site at 270, 500, and 1000 m AGL, at 12:00 UTC on May 9, 2019, when 24-hour sample S11 was collected.

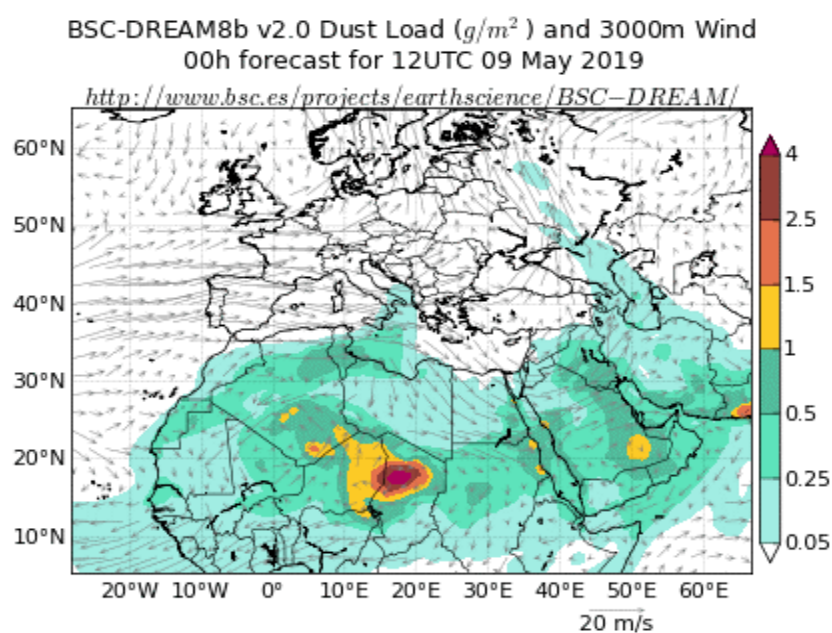

**Figure S8.** Dust load map from the BSC-DREAM8b model in the Central Mediterranean basin at 12:00 UTC on May 9, 2019, when 24-hour sample S11 was collected.

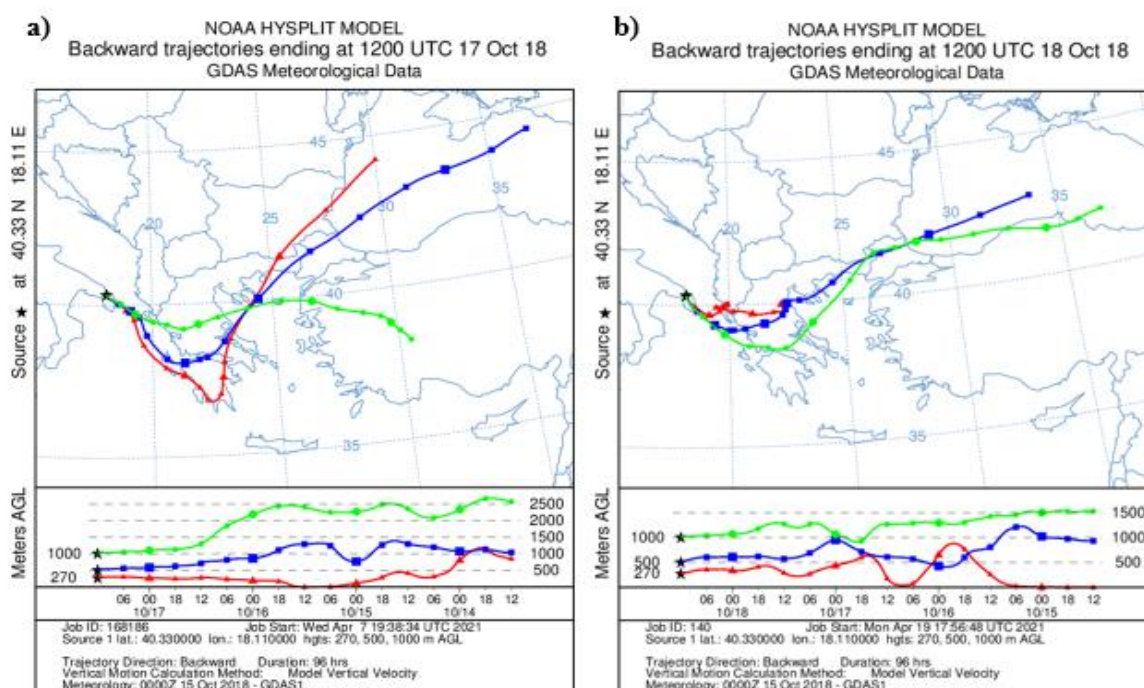

**Figure S9.** Four-day analytical back-trajectories that reached the study site at 270, 500, and 1000 m AGL, at 12:00 UTC on October (a) 17 and (b) 18, 2018, when the 48-hour sample Scheme 23. was collected.
