# Supplementary material for: Seasonal Variability of the Airborne Eukaryotic Community Structure at a Coastal Site of the Central Mediterranean
Source: Toxins (Basel). 2021 Jul 24;13(8):518. doi: 10.3390/toxins13080518 (PMC8402549; doi:10.3390/toxins13080518)
Supplement: Supplementary file 1 [file toxins-13-00518-s001.zip › toxins-1294531-supplementary table S1-S9.xlsx]

## Sheet: Table S1
Table S1. 24-hour or 48-hour (sampling time ST) mean values of PM10 mass concentrations and meteorological parameters related to the 37 analysed samples. T, RH, P, WD, and WS show the mean value of air temperature, relative humidity, atmospheric pressure,
wind direction and speed, respectively, during the sampling time interval. CR provides the cumulative rain. The reported data are grouped by seasons.
Sample	Start Date (UTC)	ST	PM10	T	RH	P	CR	WD	WS
		(h)	(µg m-3)	(°C)	(%)	(mbar)	(mm)	(deg)	(ms-1)
S1	2019-01-07	24	11	6.0	44	1017.5	0.4	342	4.4
S2	2019-01-17	24	27	6.7	73	1016.3	0.0	142	0.8
S3	2019-01-24	24	9	8.4	81	988.9	33.6	96	1.9
S4	2019-01-31	24	22	9.2	65	1002.1	5.1	240	1.7
S5	2019-02-07	24	30	10.7	64	1012.7	0.0	350	2.0
S6	2019-02-14	24	7	10.1	50	1023.4	0.0	342	4.7
S7	2019-02-21	24	47	9.6	79	1021.2	0.0	318	2.0
S8	2019-02-28	24	44	8.6	63	1016.9	0.0	345	1.3
S9	2019-04-04	24	22	14.2	75	1006.3	2.1	153	2.9
S10	2019-04-18	24	26	13.5	69	1017.5	0.0	343	2.1
S11	2019-05-09	24	25	16.5	78	1012.7	0.0	174	3.8
S12	2019-05-16	24	11	14.3	83	1006.2	27.0	28	1.2
S13	2019-05-23	24	19	17.8	69	1010.7	0.0	344	1.6
S14	2019-05-30	24	19	18.9	63	1014.9	0.1	49	1.9
S15	2019-06-06	24	20	23.2	66	1011.8	0.0	168	1.7
S16	2018-07-04	48	26	26.8	63	1010.4	0.0	357	1.5
S17	2018-07-11	48	24	26.4	58	1010.0	0.0	102	1.1
S18	2018-07-18	48	19	26.3	50	1008.1	0.0	324	2.8
S19	2018-07-25	48	25	26.9	54	1004.9	0.0	330	3.2
S20	2018-09-19	48	29	24.2	62	1014.0	0.0	28	1.4
S21	2018-10-03	48	21	21.4	74	1014.9	3.5	58	1.3
S22	2018-10-10	48	32	18.6	78	1016.5	0.0	333	1.1
S23	2018-10-17	48	40	18.6	78	1012.3	4.0	45	0.8
S24	2018-10-24	48	27	16.2	65	1010.1	0.0	332	2.4
S25	2018-11-07	48	19	16.6	82	1015.0	0.0	283	1.1
S26	2018-11-12	24	15	13.8	81	1022.2	0.0	349	0.8
S27	2018-11-14	48	21	15.5	72	1018.3	0.0	328	2.7
S28	2018-11-21	48	26	13.5	81	1011.9	0.1	312	1.0
S29	2018-11-28	48	15	11.7	66	1009.3	0.8	335	3.2
S30	2018-12-03	24	34	10.7	85	1012.3	0.0	184	0.6
S31	2018-12-10	24	12	11.7	62	1005.7	0.0	310	2.0
S32	2018-12-11	24	4	8.1	67	1011.4	5.2	316	1.6
S33	2018-12-12	24	26	6.7	70	1015.6	0.0	261	0.7
S34	2018-12-17	24	5	7.8	99	1006.6	14.5	184	0.5
S35	2018-12-18	24	8	9.1	69	1013.9	4.4	335	3.8
S36	2018-12-19	24	28	7.1	74	1019.2	0.0	319	1.5
S37	2018-12-20	24	36	8.3	81	1020.3	0.0	130	0.9

## Sheet: Table S2
Table S2. p-values, Kolmogorov-Smirnov test statistics (D_ks) and critical values (CV_ks) estimated by the one-sample Kolmogorov-Smirnov test (at the 5% significance level) indicating not normally-distributed data
for the PM10 mass concentration and meteorological parameters, in the 37 analysed samples.
Variables		p-value	D_ks	CV_ks
Mass Concentration	PM10	0.8815	0.0924	0.2183
Meteo Parameters	T	0.5641	0.1253	0.2183
	RH	0.8224	0.0995
	P	0.7555	0.1065
	CR	7.8166e-05	0.3613
	WD	0.0093	0.2637
	WS	0.2536	0.1625

## Sheet: Table S3
Table S3. Heat map of the within-sample relative abundances (%) for the 46 Streptophyta genera detected in the 37 analysed samples across the four seasons.
	WINTER								SPRING							SUMMER					AUTUMN
Sampling time	24 h	24 h	24 h	24 h	24 h	24 h	24 h	24 h	24 h	24 h	24 h	24 h	24 h	24 h	24 h	48 h	48 h	48 h	48 h	48 h	48 h	48 h	48 h	48 h	48 h	24 h	48 h	48 h	48 h	24 h	24 h	24 h	24 h	24 h	24 h	24 h	24 h
Start date	2019-01-07	2019-01-17	2019-01-24	2019-01-31	2019-02-07	2019-02-14	2019-02-21	2019-02-28	2019-04-04	2019-04-18	2019-05-09	2019-05-16	2019-05-23	2019-05-30	2019-06-06	2018-07-04	2018-07-11	2018-07-18	2018-07-25	2018-09-19	2018-10-03	2018-10-10	2018-10-17	2018-10-24	2018-11-07	2018-11-12	2018-11-14	2018-11-21	2018-11-28	2018-12-03	2018-12-10	2018-12-11	2018-12-12	2018-12-17	2018-12-18	2018-12-19	2018-12-20
Genera	S1	S2	S3	S4	S5	S6	S7	S8	S9	S10	S11	S12	S13	S14	S15	S16	S17	S18	S19	S20	S21	S22	S23	S24	S25	S26	S27	S28	S29	S30	S31	S32	S33	S34	S35	S36	S37
Ananas	0	0.0250564	0	0.00827232	0	0	0	0.00748951	0	0	0.00615025	0	0	0	0	0.0593104	0.0134713	0.0156781	0.103362	0.0227041	0.00316141	0.0744166	0	0	0.0191237	0	0	0	0	0.088963	0	0.016965	0	0	0	0.0164921	0.0249377
Arabidopsis	0	0	0	0	0	0	0	0	0	0	0	0	0	0	0	0	0	0.0104521	0	0	0	0	0	0	0	0	0	0	0	0	0	0	0.0141034	0	0	0	0
Arachis	0.324219	0.41343	0.368789	0.384663	0.322612	1.55187	0.662727	0.681546	0.553154	0.431687	0.384391	0.53576	0.304253	0.179795	0.251549	0.21837	1.53124	0.506924	1.36803	1.38949	0.385691	0.244512	0.638806	0.458998	0.252433	0.337515	0.296578	0.11203	1.2272	0.255769	0.314549	0.385953	0.634652	0.214775	0.382716	0.31335	0.32419
Asparagus	0.0244693	0.0125282	0.0223509	0	0.00645224	0.0370966	0.00478503	0.0224685	0.00514562	0	0.00615025	0.0129099	0.00315288	0.0104229	0.0112634	0.0161756	0.0134713	0.0522603	0.0182404	0.00454081	0.00316141	0	0.024728	0.0153639	0.015299	0	0.042673	0	0.00560365	0.0222408	0.00762544	0.00848248	0	0	0.0164609	0.0164921	0.0498753
Beta	19.8569	5.17414	12.8517	12.1769	12.1947	3.12848	0.76082	1.14964	3.83863	4.92212	1.52526	16.9055	3.23486	2.19923	1.9373	4.45367	5.86452	5.39326	6.25646	17.7591	21.4691	11.4283	18.7521	18.237	20.734	7.94285	7.98839	4.28914	24.1349	6.30525	18.0494	14.0215	9.42106	15.4198	11.5885	20.3018	4.67581
Brachypodium	0.018352	0	0.0491719	0.00827232	0	0.024731	0	0.00374476	0.0463106	0.302626	0.178357	0.0968242	0.11981	0.119863	0.0713347	0.0269593	0.0314331	0.0209041	0.042561	0.204336	0.0189684	0.0212619	0.0824266	0.0576147	0	0.045002	0.0341384	0	0.128884	0	0.0152509	0.00848248	0.0141034	0.0110141	0.00823045	0.0164921	0.0498753
Brassica	20.8846	24.2483	35.663	22.9143	37.5907	40.4476	82.86	80.4692	33.1249	25.0912	16.2305	14.3752	7.81284	4.46882	4.93148	9.24972	16.0421	11.8866	5.94637	16.5195	10.3457	11.221	22.5025	12.4045	16.0984	17.8489	23.1523	7.45265	16.8726	37.7815	28.4982	6.40003	13.2713	12.6635	15.07	17.7208	39.8005
Cajanus	0.110112	0.150338	0.545361	0.223353	0.361325	0.210214	0.143551	0.138556	0.144077	0.0712061	0.110705	0.213013	0.081975	0.104229	0.0262812	0.274984	1.11812	0.276979	0.46209	0.485867	0.331948	1.52023	1.33531	0.483964	1.02886	0.618777	0.844926	1.259	0.58278	0.166806	0.202074	0.178132	0.0705169	0.0440565	0.090535	0.0824606	0.0623441
Camelina	0.018352	0.0250564	0.00894035	0.024817	0.0451657	0.0989242	0.0334952	0.0748951	0.0205825	0.0178015	0	0.0193648	0.0126115	0	0.0150178	0	0	0.00522603	0.00608014	0.0136224	0.00632281	0.0106309	0.0164853	0.0268869	0	0.022501	0.0128019	0	0.016811	0.0111204	0.00762544	0.016965	0.0141034	0.0165212	0.0246914	0.0164921	0
Capsicum	1.91472	2.10474	2.36025	31.4845	5.21986	3.69729	1.89966	1.98472	5.01698	5.34935	3.30268	5.31887	2.17234	2.39206	5.688	1.22395	0.839714	0.914554	3.89129	1.06709	2.16556	1.60527	1.82163	1.70156	1.15125	1.21505	1.27166	2.60336	1.98369	1.16764	12.2007	1.62864	3.46943	3.63466	10.2551	1.30288	1.79551
Cicer	0.177403	0.451015	0.303972	0.0992679	0.219376	0.333869	0.129196	0.131067	0.221262	0.204717	0.166057	0.232378	0.308983	0.0781718	0.0788436	0.188715	0.139204	0.182911	0.267526	0.276989	1.46689	0.893	7.90471	25.942	1.36926	0.337515	1.03269	0.330755	1.96688	0.411454	0.404148	0.670116	0.620549	0.726932	0.288066	1.55026	0.137157
Citrus	0.00611733	0.0876973	0.0134105	0.00827232	0.0322612	0.259676	0.0239252	0.0599161	0.0668931	0.142412	0.0553523	0.00645494	0.0220702	0.0208458	0.0187723	0.0431348	0.0449045	0.0313562	0.042561	0.0317857	0.00632281	0.138202	0.024728	0.0115229	0.015299	0.0112505	0.0170692	0	0.0112073	0.0333611	0.00762544	0.0254475	0.0423101	0.0110141	0.0493827	0.0329843	0.0623441
Coffea	0.0672906	0.0626409	0.0648175	0.0744509	0.0387134	0.0741931	0.0143551	0.014979	0.0823299	0.0756564	0.0369015	0.0387297	0.0551755	0.0469031	0.0675803	0.0269593	0.0336783	0.0418082	0.0486411	0.0862754	0.0569053	0.0637857	0.049456	0.161321	0.061196	0.0562525	0.0341384	0.042678	0.0840548	0.0444815	0.0724417	0.0508949	0.0987236	0.0550706	0.0658436	0.0659685	0.0436409
Cucumis	0.134581	0	0.0402316	0.173719	0.0451657	0.0370966	0.00957006	0.0187238	0.0360193	0.035603	0	0.0193648	0.0157644	0.0156344	0.00375446	0.0161756	0.00449045	0.0209041	0.0364808	0.0227041	0.00632281	0.0106309	0	0.0576147	0.0191237	0.0787534	0.00853461	0.042678	0.0560365	0	0.026689	0	0	0.0275353	0.0987654	0.0494764	0.0124688
Cucurbita	0.532208	0.187923	0.0581122	0.0413616	0.277446	0.482255	0.181831	0.337028	0.0823299	0.0623053	0.0799533	0.0710044	0.217549	0.0208458	0.0675803	0.0593104	1.51328	0.621897	0.291847	0.072653	0.0569053	0.0106309	0.131883	0.0691377	0.0726702	0.067503	0.217632	0.021339	0.0616402	0.0333611	0.0343145	0.245992	0.437205	0.0715918	0.139918	0.46178	0.0997506
Cynara	0.055056	0.0375846	0.0759929	0.0827232	0.0967836	0.0989242	0.0239252	0.0524266	0.0566018	0.0534045	0.0615025	0.0774593	0.0409875	0.0416916	0.041299	0.0539185	0.0134713	0.0313562	0.0121603	0.0544897	0.0442597	0.0106309	0.0164853	0.172844	0.061196	0.022501	0.102415	0.0320085	0.537951	0.0333611	0.0610035	0.0933073	0.0423101	0.0330424	1.57202	0.0329843	0.0249377
Daucus	2.51422	0.200451	3.34369	1.26567	0.270994	1.06344	0.0478503	0.0936189	0.957086	0.578549	0.332114	1.22644	0.807138	0.797353	0.574432	0.625455	4.63863	2.10609	2.03077	1.55296	0.591183	0.233881	0.832509	1.34819	1.19332	4.86021	1.92029	2.49667	1.30005	3.83653	0.606222	0.110272	4.13229	0.236804	1.28395	2.70471	0.074813
Elaeis	0.0428213	0.325733	0.0894035	0.0579063	0.0645224	0.0494621	0.0143551	0.0112343	0.0514562	0.0178015	0.0184508	0.0645494	0.0725163	0.0469031	0.0300357	0.0539185	0.493949	0.522603	0.0486411	0.0681122	0.0663895	0.0637857	0.074184	0.161321	0.0803197	0.022501	0.0682769	0.0320085	0.117677	0	0.0686289	0.0424124	0.155137	0.0330424	0.090535	0.0329843	1.5212
Fragaria	0.0672906	0.0751691	0.0178807	0.0579063	0.0838791	0.148386	0.0334952	0.0861294	0.0617475	0.0445038	0.0922538	0.0839143	0.081975	0.0364802	0.0262812	0.0269593	0.0449045	0.0365822	0.0304007	0.0363265	0.0600667	0.0850476	0.0659413	0.0422508	0.0726702	0.045002	0.0725442	0	0.0336219	0.0111204	0.0495654	0.00848248	0.253861	0.0385494	0.106996	0.0494764	0.074813
Glycine	0.0122347	0.0125282	0.00894035	0	0.0129045	0.0123655	0.00957006	0.0374476	0.0308737	0.00890076	0.0184508	0.0516396	0.0220702	0.0104229	0.0337901	0.00539185	0	0.00522603	0.0243205	0.00908162	0.00316141	0.0212619	0.0576986	0.00384098	0.0114742	0	0.0213365	0	0	0.0222408	0.0114382	0.0763424	0.0141034	0.0165212	0.0164609	0.0164921	0.0623441
Gossypium	1.6945	4.98622	1.42151	3.13935	4.05523	10.2016	3.94287	4.23907	5.29742	4.83756	3.26578	2.23664	2.59955	1.84746	1.92791	3.2405	2.64263	2.42488	2.12501	4.93586	4.48129	4.69888	11.923	2.41022	2.47079	2.41886	2.72254	65.132	2.52445	1.7181	2.10653	2.77377	7.87674	1.72096	20.4321	2.48206	2.20698
Helianthus	0.281397	1.05237	1.07731	0.397072	0.612963	0.779028	0.186616	0.265878	0.560873	1.41522	0.375165	0.329202	0.204937	0.151132	0.138915	0.118621	0.166147	0.188137	0.231045	0.199796	0.407821	0.191357	0.214309	0.261187	0.252433	0.23626	0.204831	0.0106695	0.263372	0.211287	0.312643	0.322334	0.507722	0.782003	0.798354	0.511256	0.53616
Lupinus	1.91472	1.12754	0.138575	0.322621	0.354873	2.1887	0.425868	0.853805	0.70495	0.560748	0.473569	0.187193	0.561213	0.552414	0.330392	0.803386	20.3058	2.34126	0.237125	0.908162	0.287688	0.180726	0.568744	0.645285	0.290681	0.765033	0.926005	0.0533476	0.465103	0.144565	0.190636	0.653151	1.53727	0.440565	0.395062	0.527748	0.21197
Malus	0.00611733	0.0375846	0.026821	0	0	0	0	0	0.0102912	0	0.166057	0.0129099	0.0252231	0	0.00375446	0.00539185	0.0179618	0.0313562	0.0121603	0.0817346	0.0189684	0	0.00824266	0.00768197	0.00382475	0.0112505	0.00853461	0	0.00560365	0	0.0190636	0.00848248	0.0282068	0	0.0576132	0.0329843	0.0124688
Manihot	0.036704	0.0125282	0.0536421	0.0330893	0.0193567	0.0741931	0.0430653	0.0674056	0.041165	0.0534045	0.00615025	0.00645494	0.0189173	0.0104229	0.0187723	0.0107837	0.00898089	0.0156781	0.0121603	0.00908162	0.0189684	0.0212619	0.0576986	0.0115229	0.0114742	0.022501	0.0042673	0.0320085	0.0224146	0.0222408	0.0114382	0.016965	0.0282068	0.0220283	0.0246914	0.0164921	0.0249377
Medicago	0.428213	0.27562	0.00894035	0.0661786	0.0193567	0.11129	0	0.0674056	0.195534	1.87806	2.04803	0.129099	1.47555	0.912005	0.717102	0.0539185	0.193089	0.0679383	0.0851219	0.962652	0.00316141	0.0106309	0	0.0422508	0.0267732	0	0.0213365	0	0.0896585	0	0.183011	0.016965	0.0564135	0.0110141	0.0823045	0.0329843	0.0124688
Musa	0	0.0375846	0.00447017	0.00827232	0.0129045	0.0865587	0.253607	0.359497	0.0102912	0.0178015	0.00615025	0.00645494	0	0.00521145	0	0.0161756	0.0134713	0.0156781	0.0243205	0.00454081	0.00316141	0.0106309	0	0.0115229	0.0114742	0.022501	0	0.0106695	0	0.0111204	0.00762544	0	0	0	0	0.0164921	0.0623441
Nicotiana	2.92408	9.98497	2.53459	3.12694	2.79382	9.44726	2.46429	2.11953	3.1697	3.15087	2.14029	3.55022	2.76823	1.82922	1.99737	1.46658	1.84557	1.84479	2.85158	2.02974	1.97904	2.65774	3.46192	3.80257	2.96418	3.04888	3.21328	1.81382	3.63117	1.8571	2.64984	4.93681	5.47211	3.32627	2.88066	2.39136	2.35661
Olea	13.8252	18.9176	24.586	13.8479	24.4475	6.8505	2.32074	1.95102	26.6389	15.2203	39.4108	38.3036	26.5284	47.3148	35.5322	11.4523	12.7304	11.1994	8.54867	13.4226	17.0874	13.682	17.9031	13.6585	16.7754	16.0545	12.2429	9.15444	20.9745	28.4682	18.751	43.2437	27.417	44.3704	13.2099	19.972	20.9726
Oryza	0.464917	0.238036	0.00447017	0.0330893	0.0193567	0	0.0143551	0.119832	0.813008	20.9613	12.159	1.12316	19.1963	13.1693	6.49521	0.172539	1.71984	0.559185	0.0243205	0.00454081	0	0.0106309	0	0.0652967	0.0076495	0.0112505	0.0042673	0.021339	0.117677	0.0111204	0.0457526	0.0763424	0.267964	0.0275353	0.930041	0.0824606	0.436409
Panicum	14.443	14.7331	7.84068	3.66464	5.96832	4.97094	0.631624	1.04853	11.7114	7.47664	12.4543	8.35915	25.2609	19.9859	35.198	56.2856	8.01096	33.2218	14.7747	24.4432	27.5232	7.80311	4.60765	8.17745	25.4728	38.6567	27.6009	3.1155	13.3311	5.20434	7.89995	2.30724	9.75954	10.1	6.45267	5.0301	12.5935
Papaver	1.6945	1.25282	0.697347	0.372255	0.258089	1.76827	0.320597	0.344518	0.447669	0.311526	0.535072	0.593855	1.11612	0.442974	0.424254	0.948966	0.669077	0.763	0.948501	0.821887	0.686025	0.414607	0.848994	0.476282	0.309805	0.213759	0.320048	0.458789	0.571573	0.333611	0.693915	0.322334	0.493618	0.335931	0.814815	0.478272	0.399002
Phaseolus	0.428213	0.350789	0.362084	0.413616	0.477466	0.643007	0.344522	0.258388	0.385922	0.320427	0.289062	0.451846	0.308983	0.21367	0.285339	0.237242	0.314331	0.261301	0.261446	0.245204	0.271881	0.34019	0.552258	0.341848	0.344227	0.416268	0.298711	0.160043	0.4595	0.211287	0.316456	0.364747	0.408998	0.313903	0.419753	0.412303	0.311721
Physcomitrella	3.43182	8.66951	2.87879	2.45688	1.00655	3.16557	0.138766	0.31456	0.879901	1.1304	0.74418	1.1038	0.51392	0.599317	0.300357	5.60214	15.7076	19.237	45.449	8.95448	7.9699	38.5478	1.90406	5.84598	6.39498	2.02509	12.7208	0	4.84716	9.94162	3.53439	17.9913	7.48889	2.95179	8.83951	9.58192	8.39152
Populus	0.0978773	0.162866	0.0357614	0.0744509	0.193567	0.321504	0.349307	0.483074	0.632911	1.44192	0.215259	0.142009	0.151338	0.182401	0.165196	0.242633	1.41	0.114973	0.845139	0.154388	0.129618	0.106309	0.131883	0.0537738	0.0650207	0.101254	0.0853461	0.384102	0.151299	0.111204	0.0800671	0.127237	0.12693	0.0660848	0.131687	0.115445	0.224439
Prunus	9.45128	0.676522	0.643705	0.446706	0.338742	0.896501	0.167476	0.239664	0.76927	0.400534	0.405917	0.400207	0.458745	0.343956	0.202741	0.531098	0.159411	3.25581	0.46817	0.476785	0.319302	0.520916	0.408012	0.564625	0.439846	0.348765	0.539814	0.021339	0.846152	0.111204	0.406055	0.415642	0.839151	0.223036	0.460905	0.956543	0.467581
Rosa	0	0.225507	0	0	0	0	0.00957006	0.0112343	0.0102912	0	0	0	0.00315288	0	0.00750892	0	0	0	0	0	0.00948422	0	0	0	0.00382475	0	0	0	0	0.0111204	0	0.00848248	0	0.00550706	0.00823045	0	0.0249377
Sesamum	1.27852	1.80406	1.04602	1.28221	1.4453	4.62471	0.626839	0.812612	1.7598	1.90476	1.42071	2.48515	2.1282	1.14652	1.53557	0.975925	0.853185	0.966815	0.790418	1.30321	0.891516	1.57338	1.38477	1.27137	1.05946	1.1363	1.19911	0.362763	1.46255	0.667223	1.18194	1.31478	3.06043	1.31619	1.94239	1.35235	0.673317
Setaria	0.00611733	0	0	0	0	0	0	0	0	0	0.0123005	0	0.00945865	0.00521145	0.00375446	0.0485267	0.00449045	0.00522603	0.0364808	0.00454081	0.00632281	0	0	0.00768197	0	0	0	0	0.00560365	0	0	0	0	0	0	0.0164921	0.0124688
Solanum	0.415978	1.15886	0.404551	0.694875	0.538762	0.853221	0.476111	0.556096	0.792426	0.694259	0.553523	0.451846	0.515496	0.317899	0.31162	0.415173	0.45129	0.360596	0.407369	0.442729	0.384111	0.765428	0.766568	0.349529	0.29833	0.517523	0.30938	0.266738	0.397859	0.328051	0.459433	0.619221	1.09301	0.385494	0.609053	10.5302	0.561097
Sorghum	0.189637	0.13781	0.129635	0.173719	0.129045	0.605911	0.105271	0.0674056	0.0823299	0.222519	0.184508	0.258198	0.30583	0.109441	0.165196	0.210282	0.0853185	0.130651	0.407369	0.127143	0.116972	0.244512	0.255523	0.130593	0.130041	0.0787534	0.0938807	0.0533476	0.151299	0.0667223	0.129632	0.152685	0.0987236	0.137677	0.0740741	0.164921	0.137157
Theobroma	0	0.0626409	0.00894035	0	0.00645224	0	0.0143551	0	0.00514562	0	0.00615025	0	0	0	0	0.00539185	0	0	0	0	0.00316141	0	0	0.00384098	0.00382475	0	0	0	0.0224146	0.088963	0.0114382	0.00848248	0	0	0.0164609	0.263874	0
Vigna	0.165168	0.338261	0.147516	0.306076	0.264542	0.544083	0.239252	0.355752	0.465679	0.24032	0.258311	0.322747	0.214396	0.125075	0.198986	0.253417	0.233503	0.182911	0.234085	0.263367	0.271881	0.356137	0.473953	0.345688	0.336578	0.326264	0.260306	0.202721	0.302597	0.144565	0.289767	0.220545	0.564135	0.181733	0.193416	0.164921	0.32419
Vitis	0.00611733	0.0125282	0	0	0.0193567	0.024731	0.0191401	0.0299581	0.0514562	0.0712061	0.024601	0	0.0220702	0	0.00750892	0.0269593	0.00898089	0.0104521	0	0.00454081	0	0	0.0659413	0.00384098	0	0	0.0042673	0	0.016811	0	0.00381272	0.00848248	0.0564135	0	0.00823045	0	0.0249377
Zea	0.00611733	0.0250564	0.00894035	0.00827232	0.0516179	0.0123655	0.00478503	0.00748951	0.0102912	0.160214	0.159907	0.135554	0.145033	0.0885947	0.0563169	0.129404	0.0269427	0.0365822	0.279686	0.472244	0.0126456	0.148833	0.098912	0.0691377	0.0114742	0.0112505	0.00853461	0	0.0672438	0	0.0152509	0.016965	0.0282068	0	0.00823045	0.0164921	0.0249377
Ziziphus	0.0428213	0.112754	0.0447017	0.0413616	0.0774268	0.0741931	0.0478503	0.0524266	0.154369	0.11571	0.0799533	0.0580945	0.0725163	0.0364802	0.0976159	0.124013	0.040414	0.0783904	0.0182404	0.0408673	0.0252912	0.0531547	0.0329707	0.0768197	0.0535465	0.045002	0.0640096	0.0320085	0.140091	0.111204	0.0571908	0.0763424	0.0846203	0.0275353	0.0576132	0.0659685	0.0997506

## Sheet: Table S4
Table S4. Heat map of the within-sample relative abundances (%) for the 22 Fungi genera detected in the 37 analysed samples across the four seasons.
The corresponding phyla related to each genus are also reported in the first column.
		WINTER								SPRING							SUMMER					AUTUMN
	Sampling time	24 h	24 h	24 h	24 h	24 h	24 h	24 h	24 h	24 h	24 h	24 h	24 h	24 h	24 h	24 h	48 h	48 h	48 h	48 h	48 h	48 h	48 h	48 h	48 h	48 h	24 h	48 h	48 h	48 h	24 h	24 h	24 h	24 h	24 h	24 h	24 h	24 h
	Start date	2019-01-07	2019-01-17	2019-01-24	2019-01-31	2019-02-07	2019-02-14	2019-02-21	2019-02-28	2019-04-04	2019-04-18	2019-05-09	2019-05-16	2019-05-23	2019-05-30	2019-06-06	2018-07-04	2018-07-11	2018-07-18	2018-07-25	2018-09-19	2018-10-03	2018-10-10	2018-10-17	2018-10-24	2018-11-07	2018-11-12	2018-11-14	2018-11-21	2018-11-28	2018-12-03	2018-12-10	2018-12-11	2018-12-12	2018-12-17	2018-12-18	2018-12-19	2018-12-20
Phyla	Genera	S1	S2	S3	S4	S5	S6	S7	S8	S9	S10	S11	S12	S13	S14	S15	S16	S17	S18	S19	S20	S21	S22	S23	S24	S25	S26	S27	S28	S29	S30	S31	S32	S33	S34	S35	S36	S37
Ascomycota	Aspergillus	11.7853	16.9728	4.548	7.17703	8.43701	12.8775	6.17284	23.2611	1.76954	1.99291	0.538913	1.15911	1.4705	2.32058	0.881395	2.33415	4.40659	9.22674	4.74807	6.96759	6.1955	1.61806	1.17938	2.6105	2.05995	3.62974	8.49604	0.833924	4.2045	2.76553	5.01497	5.83694	25.1664	10.4591	10.8976	6.96095	16.3705
	Botrytis	15.1547	2.72109	27.6241	13.6581	13.074	34.5299	28.5714	20.9806	41.4101	56.3418	15.4224	62.6054	74.653	50.1306	72.9067	3.95354	0.371822	3.35647	1.19532	1.63194	3.99513	0.865475	0.725157	1.85108	13.0982	15.8504	15.6834	0.207118	9.35649	0.480962	28.0689	6.73255	0.570451	30.5868	15.4646	2.37691	1.04241
	Candida	0.106724	0	0.0448079	0.0869943	0.180955	0.683761	0	0.4561	0.0278668	0.0675562	0.0396259	0.0263435	0.0253534	0.0153681	0.0287411	0.0111682	0	0.049568	0.0166016	0.0636574	0.0405597	0.0376294	0.031875	0.0355977	0	0.0475511	0.137203	0.00545048	0.0986972	0.0801603	0.0998004	1.05003	0.019015	0	0	1.42615	0.0947643
	Colletotrichum	11.7091	3.80952	24.8684	3.30579	6.33341	1.82336	5.29101	2.2805	17.8069	0.574227	0.317007	4.84721	1.45782	2.36668	0.670627	45.2982	24.2689	9.46042	29.3683	36.8056	12.7358	41.5992	7.62611	6.01602	28.8879	1.23633	4.03166	7.71788	7.48125	57.4482	7.23553	7.47375	23.2173	10.1551	17.7707	13.5144	34.8259
	Fusarium	2.82055	0.272109	1.1314	1.26142	1.83216	1.36752	1.23457	2.96465	0.459802	0.202668	0.150579	0.256849	0.602142	0.461042	0.392796	0.670092	0.693398	1.29585	0.70557	1.79977	1.56155	0.545626	0.398438	0.789083	0.51013	0.602314	1.65699	0.130812	1.27319	0.187041	1.28493	0.679432	0.874691	1.06415	1.28872	0.203735	1.61099
	Kazachstania	0	0	0	0	0	0	0	0	0	0	0	0	0	0	0	0	0	0	0	0	0	0	0	0	0.0777341	0	0	0	0	0.0801603	0	0	0	0	0	0	0
	Lachancea	0	0	0	0	0	0	0	0	0	0	0	0	0	0	0	0	0	0	0	0	0	0	0	0	0	0	0.0211082	0	0	0.0267201	0	0	0	0	0.0452182	0	0
	Nakaseomyces	0.24394	0	0	0	0.135716	0	0	0	0	0	0	0	0	0	0	0	0	0	0	0	0	0	0	0	0	0	0	0	0	0	0	0	0	0	0	0	0
	Neurospora	1.6161	0.680272	2.35241	3.0448	1.80955	1.36752	1.41093	4.561	1.25401	0.574227	0.602314	1.01423	1.4705	1.41386	1.34125	2.05495	3.19566	8.58235	14.3272	2.48843	3.14338	1.73095	0.334688	7.53486	2.92474	0.221905	4.07388	0.555949	5.98105	9.77956	2.39521	1.42063	5.01997	3.10125	6.69229	4.75382	1.65837
	Ogataea	0.182955	0	0	0.260983	0.0452386	0	0	0.4561	0	0	0.0158504	0.0131718	0	0.0307361	0.0191608	0	0.040197	0.0141623	0	0	0.0202799	0.0188147	0.00796876	0	0.0485838	0	0	0	0	0	0.0499002	0	0	0	0.135655	0	0
	Pochonia	4.93978	1.02041	13.8008	9.2214	5.1572	9.80057	0.352734	5.70125	1.95068	1.31735	2.09225	2.52898	2.97902	4.05717	1.05384	0.938128	1.24611	4.34783	1.29493	3.26389	2.3119	0.489182	0.613595	2.49184	1.2729	1.90204	5.55145	7.59797	8.5077	0.347361	8.48303	3.27363	4.82982	5.89845	12.6159	2.44482	0.236911
	Scheffersomyces	4.08599	0.408163	6.85561	3.91475	7.46437	0.797721	1.41093	2.05245	14.5465	1.14845	0.253606	11.1828	0.697217	0.645459	0.364054	0.692428	0.562758	0.49568	0.19922	1.71296	3.36646	1.12888	0.446251	2.97834	3.33285	1.10953	3.96834	0.730365	7.28385	1.97729	7.48503	1.17356	1.92052	5.41198	4.29573	2.78438	1.94267
	Schizosaccharomyces	0.487879	0.204082	0.0672118	0	0.226193	0.22792	1.41093	0	0	0.0337781	0.0158504	0.0658588	0.03803	0	0.0383215	0.0223364	0	0.0424869	0	0.0462963	0.0405597	0.0940734	0.135469	0.0118659	0.0777341	0.0317007	0	0.010901	0.0394789	0.133601	0.174651	0.1853	0.03803	0.547279	0.0452182	0.135823	0.189529
	Sugiyamaella	2.68334	4.21769	2.44203	1.91388	3.981	8.54701	1.76367	6.84151	1.89494	1.18223	0.221905	1.14594	1.36908	1.8749	1.68615	9.64932	11.0843	3.58306	11.9532	1.2037	8.57838	24.4967	62.5468	1.1154	2.21542	5.64273	7.87335	37.9899	10.4422	13.0127	4.24152	34.3422	3.21354	3.77014	7.461	9.10017	24.4966
	Tetrapisispora	0.0609849	0	0.291251	0.0869943	0.0452386	0	0	0	0.0836004	0	0.0317007	0.0131718	0.03803	0.0614723	0.076643	0.0223364	0.0904432	0.0424869	0.0166016	0	0.0405597	0	0	0.0118659	0.0194335	0.0634015	0.168865	0	0.296092	0	0.12475	0.123533	0	0	0.0904364	2.03735	0.0473821
	Thermothelomyces	0.0914774	0	0.0672118	0	0	0.22792	0	0	0	0.0337781	0.0475511	0.0131718	0.0507067	0	0.0383215	0.0446728	0.0200985	0.169948	0.415041	0.0925926	0.0202799	0.056444	0.00796876	0	0.0291503	0	0.0211082	0	0.0986972	0	0.0249501	0	2.73816	0	0.0452182	0.40747	0.0473821
	Thielavia	13.6911	20.8163	4.45838	6.26359	5.47387	8.88889	21.8695	12.5428	2.31294	2.39824	1.04612	1.15911	1.41979	3.3195	1.22629	24.1903	38.3379	20.6628	32.7052	25.5324	13.2225	13.5466	16.3041	2.95461	3.58548	2.53606	11.504	11.9366	5.23095	3.01937	4.06687	5.92959	7.37783	4.37823	1.9896	37.2835	3.88534
	Zymoseptoria	0.182955	0.47619	0.156828	0.0869943	0.180955	1.02564	0	0	0.919604	0.675562	0.142653	0.22392	0.34227	0.645459	0.191608	0.312709	0.0502462	0.0283246	0.116212	0.0925926	0.182519	0.0188147	0.159375	0.106793	0.038867	0.0634015	0.126649	0	1.12515	0	0.399202	0	0	0.182426	0.316527	0	0.0947643
Basidiomycota	Cryptococcus	23.2352	2.21088	8.87196	41.1048	41.0993	7.23647	12.8748	11.5165	5.69876	14.0686	8.81281	8.81849	8.07505	19.625	9.79115	1.31785	0.72857	2.71208	0.464846	3.37963	8.77104	3.43368	5.80126	33.9128	28.3438	60.3741	19.2929	0.0599553	24.7434	1.09552	21.7191	4.84867	2.2723	15.2022	11.2593	1.49406	0.852878
	Malassezia	3.6286	25.5102	2.15078	4.34972	2.85003	7.74929	12.6984	0.4561	0.61307	1.79024	0.744968	1.97576	0.494391	0.522514	0.689787	1.45187	2.23093	0.467356	1.26172	0.335648	18.3533	8.74882	2.86079	31.5989	10.0957	2.28245	6.73351	32.027	11.1923	9.37876	5.16467	18.3447	22.2476	8.02676	8.18449	14.8048	7.20208
	Ustilago	3.29318	20.6803	0.224039	4.26272	1.67383	2.849	4.93827	5.9293	9.25178	17.5646	69.5039	2.95047	4.81714	12.5096	8.60318	7.03596	12.6721	35.4624	1.21192	14.5833	17.4204	1.56162	0.820783	5.98042	3.38143	4.4064	10.6596	0.196217	2.64508	0.160321	3.96707	8.52378	0.494391	1.21618	1.40176	0.271647	5.35418
Microsporidia	Encephalitozoon	0	0	0	0	0	0	0	0	0	0	0	0	0	0	0	0	0	0	0	0	0	0.00940734	0	0	0	0	0	0	0	0	0	0.0617665	0	0	0	0	0

## Sheet: Table S5
Table S5. Seasonal mean values (± standard deviation) of the number of Viridiplantae and Fungi Operational Taxonomic Units (OTUs) and genera, and Shannon (H) and Simpson (D) indices at the genus level
in winter (January, February and March: samples S1-S8), spring (April, May and June: samples S9-S15), summer (July, August and September: samples S16-S20) and autumn (October, November and December: samples S21-S37).
Sample	Viridiplantae				Fungi
	n° OTUs	n° genera	At genus level		n° OTUs	n° genera	At genus level
			Shannon index (H)	Simpson index (D)			Shannon index (H)	Simpson index (D)
Winter (mean ± SD)	142 ± 4	41 ± 2	1.86 ± 0.57	0.31 ± 0.23	69 ± 7	16 ± 2	2.06 ± 0.11	0.18 ± 0.03
Spring (mean ± SD)	143 ± 4	42 ± 1	2.03 ± 0.19	0.21 ± 0.05	72 ± 4	17 ± 1	1.36 ± 0.29	0.42 ± 0.13
Summer (mean ± SD)	145 ± 6	43 ± 2	2.11 ± 0.27	0.21 ± 0.09	71 ± 3	17 ± 1	1.78 ± 0.11	0.24 ± 0.03
Autumn (mean ± SD)	138 ± 11	40 ± 4	2.08 ± 0.25	0.20 ± 0.08	71 ± 5	17 ± 1	1.92 ± 0.34	0.22 ± 0.10

## Sheet: Table S6
Table S6. Bray-Curtis dissimilarity matrix based on the relative abundances of the 12 most abundant and pervasive Streptophyta genera (≥1.17% mean within-sample relative abundance) detected in the 37 analysed samples (winter samples: BLUE, spring: GREEN, summer: RED, autumn: BLACK).
Values close to 0 indicate samples that share species with similar abundances, while values close to 1 indicate samples that have different species abundances.
Colonna1	S1	S2	S3	S4	S5	S6	S7	S8	S9	S10	S11	S12	S13	S14	S15	S16	S17	S18	S19	S20	S21	S22	S23	S24	S25	S26	S27	S28	S29	S30	S31	S32	S33	S34	S35	S36	S37
S1	0
S2	0.375542	0
S3	0.232174	0.403957	0
S4	0.333271	0.444069	0.316917	0
S5	0.332158	0.333236	0.179104	0.272369	0
S6	0.453532	0.273479	0.470507	0.488627	0.430567	0
S7	0.627078	0.580725	0.535342	0.593749	0.451653	0.551979	0
S8	0.597127	0.547457	0.512192	0.578502	0.432589	0.522314	0.0593298	0
S9	0.342524	0.258656	0.254543	0.344236	0.169484	0.346974	0.485902	0.453594	0
S10	0.324793	0.323604	0.402699	0.386464	0.303749	0.394165	0.563502	0.535298	0.234316	0
S11	0.364104	0.378484	0.412781	0.495888	0.330103	0.505817	0.593143	0.551774	0.253584	0.270508	0
S12	0.288096	0.383246	0.266424	0.321852	0.229449	0.436987	0.653756	0.630235	0.234053	0.351662	0.300787	0
S13	0.355205	0.372949	0.420476	0.504209	0.383183	0.467975	0.660642	0.633126	0.254516	0.201676	0.216683	0.340602	0
S14	0.386562	0.448683	0.439484	0.545894	0.435633	0.560709	0.686356	0.64174	0.322549	0.370199	0.140219	0.350792	0.208178	0
S15	0.443209	0.415684	0.446599	0.509002	0.369079	0.533043	0.672962	0.630723	0.271199	0.382404	0.207402	0.317657	0.233041	0.186772	0
S16	0.453264	0.435628	0.478784	0.510027	0.472095	0.578744	0.647039	0.600915	0.418877	0.478427	0.47759	0.508631	0.398709	0.43202	0.332098	0
S17	0.376979	0.498737	0.379507	0.531865	0.545563	0.55421	0.705794	0.665444	0.49728	0.499836	0.529633	0.526264	0.538724	0.544526	0.563526	0.521236	0
S18	0.312632	0.395195	0.382542	0.479292	0.489263	0.509581	0.662989	0.614533	0.403101	0.457079	0.461671	0.464226	0.385136	0.41507	0.347796	0.254158	0.311711	0
S19	0.372048	0.440167	0.405791	0.473344	0.484528	0.539439	0.669902	0.646385	0.416818	0.482526	0.518557	0.455981	0.4757	0.499152	0.490244	0.450189	0.410089	0.247459	0
S20	0.176121	0.343686	0.285697	0.33635	0.323815	0.49554	0.629998	0.581525	0.334911	0.408294	0.419404	0.273994	0.371166	0.414648	0.38586	0.320696	0.404419	0.229608	0.350315	0
S21	0.272277	0.394128	0.346354	0.408843	0.333811	0.593832	0.642932	0.615869	0.407262	0.465179	0.461708	0.32747	0.396601	0.433873	0.378774	0.30523	0.514122	0.323284	0.431393	0.151007	0
S22	0.378708	0.366187	0.373191	0.393556	0.302802	0.536979	0.623917	0.597444	0.389953	0.411721	0.461393	0.364591	0.464659	0.529381	0.491332	0.451279	0.468436	0.356715	0.23626	0.302481	0.331894	0
S23	0.240977	0.354584	0.293139	0.312112	0.246726	0.437855	0.581379	0.554112	0.292546	0.354823	0.431925	0.245827	0.430816	0.481532	0.474951	0.491358	0.524469	0.469267	0.487458	0.238355	0.264637	0.343113	0
S24	0.292903	0.447437	0.36056	0.375674	0.384506	0.533819	0.67617	0.653938	0.428859	0.472733	0.533265	0.308784	0.509424	0.551824	0.554195	0.490077	0.518488	0.451463	0.470821	0.266981	0.316411	0.379066	0.213574	0
S25	0.195641	0.374377	0.281766	0.330373	0.305898	0.531157	0.625047	0.612465	0.348191	0.430303	0.449	0.258359	0.370969	0.432673	0.405713	0.331542	0.478225	0.309108	0.396143	0.115039	0.0864017	0.335246	0.219116	0.252059	0
S26	0.296652	0.425594	0.255826	0.406889	0.40074	0.545445	0.641219	0.626466	0.373579	0.44719	0.481284	0.404721	0.404691	0.464515	0.386957	0.315783	0.33466	0.272945	0.409726	0.28769	0.344265	0.454917	0.400475	0.427531	0.271126	0
S27	0.258153	0.318054	0.285751	0.333955	0.341339	0.468913	0.571986	0.551207	0.309218	0.387519	0.453108	0.369245	0.372824	0.440869	0.399866	0.289443	0.377299	0.170979	0.285121	0.172743	0.257938	0.318958	0.334318	0.34622	0.191524	0.199665	0
S28	0.500294	0.623403	0.464254	0.554006	0.574382	0.600248	0.676676	0.666968	0.528383	0.582378	0.624936	0.571906	0.600051	0.609555	0.620738	0.563032	0.542178	0.484618	0.495959	0.5215	0.569354	0.602305	0.535963	0.589117	0.560089	0.496285	0.491316	0
S29	0.180507	0.322123	0.260243	0.324029	0.266373	0.472365	0.63174	0.607523	0.274499	0.384799	0.38221	0.196117	0.375009	0.425898	0.411956	0.438513	0.47799	0.386197	0.402503	0.175795	0.189625	0.33044	0.167468	0.233733	0.125995	0.348141	0.279003	0.56641	0
S30	0.381068	0.439754	0.159236	0.449664	0.320094	0.523292	0.554751	0.545473	0.321751	0.483509	0.458709	0.400422	0.487923	0.475892	0.488702	0.500914	0.33388	0.372178	0.419136	0.381688	0.435999	0.467858	0.438352	0.484964	0.40064	0.292952	0.312649	0.463341	0.402474	0
S31	0.255046	0.373339	0.23263	0.222337	0.176703	0.487878	0.54592	0.534459	0.279632	0.345078	0.421898	0.23325	0.448784	0.47728	0.431189	0.455655	0.527137	0.469088	0.465779	0.250971	0.237662	0.338825	0.206671	0.305573	0.210463	0.394143	0.328538	0.579876	0.216039	0.385554	0
S32	0.419875	0.370464	0.37063	0.423626	0.303583	0.555296	0.665883	0.649346	0.400834	0.499202	0.378906	0.252723	0.464833	0.386891	0.424408	0.528692	0.543512	0.457572	0.458048	0.368627	0.361521	0.294581	0.343032	0.387441	0.352083	0.493181	0.379769	0.645979	0.320624	0.427038	0.349879	0
S33	0.321343	0.311575	0.244437	0.417917	0.349009	0.351315	0.684551	0.654622	0.290505	0.407844	0.416602	0.251671	0.379488	0.460057	0.434534	0.506454	0.359979	0.388657	0.409186	0.337606	0.417292	0.393313	0.359315	0.397463	0.371651	0.279809	0.327801	0.507977	0.303738	0.27166	0.39751	0.348168	0
S34	0.325374	0.384781	0.290141	0.362123	0.217321	0.547326	0.635042	0.624463	0.296671	0.417714	0.274304	0.148362	0.40133	0.308553	0.339016	0.483023	0.571084	0.494197	0.489606	0.31492	0.29567	0.341232	0.278556	0.34113	0.273335	0.417902	0.372233	0.611861	0.240777	0.411647	0.238184	0.155125	0.340141	0
S35	0.299121	0.33699	0.315909	0.242421	0.268213	0.397627	0.616099	0.589987	0.282696	0.31426	0.42959	0.253661	0.401398	0.488301	0.432461	0.451898	0.441593	0.368286	0.370714	0.234493	0.344469	0.27729	0.265792	0.338536	0.290827	0.396647	0.293478	0.447025	0.266568	0.416149	0.245435	0.382532	0.290175	0.345039	0
S36	0.107066	0.394219	0.22294	0.367428	0.323601	0.497122	0.65072	0.624203	0.373323	0.360302	0.36823	0.28675	0.379941	0.410043	0.459964	0.498678	0.364123	0.346044	0.403793	0.196143	0.259141	0.351278	0.230194	0.301288	0.207476	0.339674	0.294853	0.505349	0.175428	0.302016	0.265456	0.354117	0.300815	0.332131	0.287691	0
S37	0.391917	0.270961	0.282498	0.443758	0.234473	0.463508	0.404617	0.391341	0.222528	0.369446	0.344249	0.405906	0.400342	0.415512	0.404642	0.386881	0.478032	0.373348	0.409278	0.341914	0.347611	0.366955	0.378086	0.472182	0.346875	0.424505	0.316026	0.577858	0.327433	0.272379	0.30851	0.41048	0.415383	0.367821	0.381054	0.37742	0

## Sheet: Table S7
Table S7. Bray-Curtis dissimilarity matrix based on the relative abundances of the 12 most abundant and pervasive Ascomycota-Basidiomycota genera (≥0.95% mean within-sample relative abundance) detected in the 37 analysed samples (winter samples: BLUE, spring: GREEN, summer: RED, autumn: BLACK).
Values close to 0 indicate samples that share species with similar abundances, while values close to 1 indicate samples that have different species abundances.
Colonna1	S1	S2	S3	S4	S5	S6	S7	S8	S9	S10	S11	S12	S13	S14	S15	S16	S17	S18	S19	S20	S21	S22	S23	S24	S25	S26	S27	S28	S29	S30	S31	S32	S33	S34	S35	S36	S37
S1	0
S2	0.534894	0
S3	0.389153	0.704868	0
S4	0.285247	0.621838	0.299037	0
S5	0.21365	0.622472	0.325534	0.168472	0
S6	0.317466	0.509862	0.348832	0.318774	0.388281	0
S7	0.335692	0.396451	0.456356	0.410241	0.425699	0.31598	0
S8	0.212465	0.516561	0.451226	0.378841	0.349597	0.32746	0.415809	0
S9	0.512723	0.704385	0.386278	0.562583	0.471086	0.540396	0.51183	0.591062	0
S10	0.586618	0.618585	0.564743	0.575606	0.57722	0.528778	0.467741	0.590369	0.403182	0
S11	0.711442	0.698155	0.709269	0.682035	0.708545	0.710239	0.700009	0.710678	0.64299	0.48341	0
S12	0.575712	0.754228	0.447086	0.554924	0.483713	0.575554	0.56714	0.636397	0.239354	0.333421	0.616928	0
S13	0.582448	0.733039	0.514559	0.541146	0.570169	0.484577	0.5073	0.564499	0.423535	0.26631	0.572091	0.279843	0
S14	0.466875	0.638873	0.46334	0.436015	0.446676	0.434573	0.446177	0.491599	0.370585	0.183691	0.528214	0.366238	0.218906	0
S15	0.659975	0.721665	0.599392	0.625214	0.653128	0.568773	0.534654	0.635172	0.44295	0.223502	0.544937	0.303248	0.110355	0.254714	0
S16	0.551423	0.514281	0.537166	0.614521	0.620768	0.609417	0.46005	0.59332	0.581638	0.675815	0.760418	0.715371	0.635019	0.611871	0.664278	0
S17	0.560133	0.496445	0.544278	0.598801	0.627752	0.616563	0.48126	0.584116	0.620279	0.692491	0.761216	0.752522	0.691845	0.634258	0.712728	0.227935	0
S18	0.415301	0.432804	0.529266	0.454919	0.468242	0.474358	0.438611	0.403977	0.651467	0.670551	0.595597	0.7228	0.636013	0.557409	0.702551	0.439591	0.395498	0
S19	0.589524	0.578964	0.566311	0.634412	0.645717	0.639934	0.531264	0.586884	0.671554	0.76932	0.844196	0.787695	0.725648	0.707272	0.77273	0.300499	0.229348	0.375802	0
S20	0.385956	0.503521	0.454371	0.471754	0.444667	0.522673	0.410512	0.430419	0.58272	0.674454	0.716717	0.698023	0.635572	0.581366	0.711186	0.248877	0.281679	0.290966	0.367783	0
S21	0.342817	0.36444	0.449127	0.380138	0.395461	0.424841	0.321676	0.40581	0.54742	0.595337	0.651856	0.603374	0.611243	0.558789	0.655976	0.440478	0.394808	0.341721	0.50145	0.306365	0
S22	0.571172	0.563791	0.571292	0.640969	0.644044	0.592282	0.497907	0.65179	0.625797	0.731116	0.8183	0.726955	0.693852	0.685907	0.731039	0.239669	0.384394	0.582601	0.434038	0.396508	0.423146	0
S23	0.631218	0.59422	0.707465	0.696791	0.681835	0.662904	0.570696	0.686127	0.71303	0.724161	0.790776	0.726322	0.721524	0.698196	0.718338	0.493621	0.516155	0.602711	0.571406	0.611183	0.554908	0.389521	0
S24	0.523147	0.511791	0.582718	0.400032	0.450876	0.619853	0.505721	0.586116	0.636503	0.652413	0.740943	0.632505	0.63417	0.555533	0.695786	0.647589	0.623466	0.524077	0.600521	0.600271	0.363556	0.608535	0.725968	0
S25	0.428938	0.620784	0.414367	0.357064	0.404442	0.573348	0.447596	0.585099	0.46534	0.534712	0.659101	0.533684	0.558537	0.461993	0.575812	0.442017	0.488093	0.613142	0.535101	0.477739	0.380132	0.373387	0.64476	0.346415	0
S26	0.512774	0.697885	0.583885	0.361105	0.382742	0.575569	0.536308	0.586529	0.602189	0.493282	0.607363	0.59028	0.515355	0.437204	0.563635	0.637176	0.63998	0.665	0.714413	0.662907	0.574465	0.661147	0.677798	0.4734	0.407117	0
S27	0.209826	0.501716	0.370583	0.200763	0.216943	0.303006	0.337521	0.248977	0.533833	0.540084	0.640716	0.544646	0.535113	0.405647	0.595008	0.521086	0.487937	0.337137	0.546435	0.360906	0.227747	0.533559	0.611093	0.423479	0.383534	0.466896	0
S28	0.657748	0.48498	0.656953	0.633509	0.693289	0.573301	0.642739	0.689252	0.802462	0.822934	0.848913	0.788505	0.797192	0.744535	0.860622	0.662285	0.652671	0.668563	0.701075	0.698186	0.498548	0.486716	0.459463	0.48213	0.678499	0.780859	0.581547	0
S29	0.315292	0.616759	0.302218	0.235328	0.249906	0.308514	0.378992	0.410378	0.498121	0.619048	0.744111	0.535033	0.614395	0.498675	0.692728	0.60484	0.586236	0.461398	0.56045	0.540595	0.355072	0.573376	0.666476	0.368632	0.374488	0.520766	0.256682	0.54786	0
S30	0.69592	0.683424	0.606563	0.679733	0.702972	0.700397	0.649377	0.702716	0.674452	0.765584	0.858641	0.749128	0.785652	0.75539	0.802142	0.401265	0.525961	0.574593	0.396088	0.539717	0.527564	0.323111	0.665112	0.519749	0.4158	0.746097	0.599233	0.666482	0.53597	0
S31	0.283904	0.639337	0.182185	0.183847	0.18994	0.284316	0.34629	0.376769	0.382387	0.482899	0.68055	0.40372	0.480155	0.358178	0.559854	0.605936	0.605669	0.490118	0.635688	0.500977	0.393796	0.621499	0.684678	0.463311	0.384021	0.465527	0.235598	0.615438	0.156074	0.656799	0
S32	0.447918	0.42001	0.530097	0.480771	0.473481	0.397532	0.347822	0.520425	0.546601	0.585831	0.698277	0.642959	0.563867	0.502256	0.643686	0.520372	0.517528	0.516051	0.576576	0.514711	0.300625	0.41214	0.450781	0.444434	0.486784	0.562913	0.412102	0.362592	0.368037	0.574181	0.44671	0
S33	0.430456	0.40089	0.49368	0.509592	0.508136	0.384868	0.479798	0.373506	0.631108	0.750015	0.843548	0.744384	0.712001	0.658823	0.79948	0.57862	0.549861	0.48259	0.539173	0.494597	0.397278	0.540676	0.721725	0.453893	0.50668	0.720361	0.447738	0.542975	0.402019	0.532099	0.512272	0.3865	0
S34	0.26143	0.544339	0.238096	0.245395	0.234875	0.26602	0.325288	0.332464	0.410868	0.4815	0.686929	0.435107	0.467912	0.371907	0.549354	0.591663	0.575268	0.432278	0.596826	0.480298	0.341877	0.563316	0.673295	0.453768	0.354965	0.508303	0.201825	0.614257	0.252527	0.587295	0.156705	0.416914	0.401466	0
S35	0.324288	0.594275	0.209006	0.258726	0.335645	0.283071	0.447336	0.360199	0.512687	0.628497	0.719888	0.576958	0.590319	0.537607	0.668162	0.589327	0.572519	0.405825	0.525196	0.483115	0.362483	0.562135	0.707644	0.453436	0.406411	0.575476	0.248498	0.612111	0.231399	0.497716	0.256684	0.471762	0.393759	0.203667	0
S36	0.500781	0.455832	0.606722	0.583523	0.590731	0.493232	0.411098	0.559519	0.642394	0.73458	0.832496	0.718832	0.752841	0.705893	0.808459	0.487868	0.366857	0.492427	0.408677	0.468362	0.380855	0.532043	0.626296	0.541153	0.547577	0.735435	0.482911	0.579979	0.444687	0.538027	0.578492	0.426564	0.346197	0.505285	0.502271	0
S37	0.435592	0.485573	0.502917	0.518592	0.47749	0.449111	0.484059	0.447181	0.622939	0.732422	0.838453	0.741828	0.704445	0.68826	0.752369	0.412369	0.475218	0.518638	0.499099	0.35163	0.384365	0.299255	0.577194	0.610567	0.446139	0.671987	0.411366	0.639211	0.513763	0.418136	0.51071	0.414901	0.405726	0.432515	0.41366	0.573332	0

## Sheet: Table S8
Table S8. p-values, Kolmogorov-Smirnov test statistics (D_ks) and critical values (CV_ks) estimated by the one-sample Kolmogorov-Smirnov test (at the 5% significance level) indicating not normally-distributed data
for the 12 most abundant and pervasive Streptophyta and Ascomycota-Basidiomycota genera in the 37 analysed samples.
Variables		p-value	D_ks	CV_ks
Streptophyta genera	Brassica	0.1176	0.1910	0.2183
	Olea	0.3543	0.1483
	Panicum	0.0620	0.2117
	Beta	0.2082	0.1703
	Physcomitrella	0.0298	0.2332
	Gossypium	2.5653e-05	0.3802
	Capsicum	0.0029	0.2907
	Nicotiana	0.0112	0.2590
	Daucus	0.0917	0.1993
	Sesamum	0.0891	0.2002
	Cicer	6.8348e-06	0.4013
	Lupinus	4.456e-05	0.3710
Ascomycota-Basidiomycota genera	Botrytis	0.0376	0.2266	0.2183
	Colletotrichum	0.0632	0.2111
	Thielavia	0.0726	0.2068
	Sugiyamaella	0.0150	0.2515
	Aspergillus	0.2497	0.1632
	Pochonia	0.2071	0.1705
	Neurospora	0.0419	0.2235
	Scheffersomyces	0.0684	0.2087
	Fusarium	0.3179	0.1531
	Cryptococcus	0.1316	0.1871
	Ustilago	0.0114	0.2586
	Malassezia	0.1018	0.1959

## Sheet: Table S9
Table S9. Spearman correlation coefficients between the 12 most abundant and pervasive Streptophyta (green) and Ascomycota-Basidiomycota (red) genus RAs, meteorological parameters (blue), and PM10 mass concentrations (grey) in the 37 analysed samples.
Values significant at a p-level < 0.05 and 0.01 are in bold and in bold-italic, respectively.
	Brassica	Olea	Panicum	Beta	Physcomitrella	Gossypium	Capsicum	Nicotiana	Daucus	Sesamum	Cicer	Lupinus	Botrytis	Colletotrichum	Thielavia	Sugiyamaella	Aspergillus	Pochonia	Neurospora	Scheffersomyces	Fusarium	Cryptococcus	Ustilago	Malassezia	T	RH	P	CR	WS	PM10
Brassica
Olea	-0.16833
Panicum	-0.41275	0.11048
Beta	-0.06899	0.14699	0.020152
Physcomitrella	-0.15149	-0.18137	0.16809	0.41441
Gossypium	0.10835	-0.34827	-0.32006	-0.17686	-0.07871
Capsicum	0.031057	0.25036	-0.23945	-0.15055	-0.48815	0.11214
Nicotiana	0.19559	0.16975	-0.16169	0.3267	0.072072	0.17994	0.25605
Daucus	-0.10313	-0.14794	0.15813	0.30156	0.28521	-0.1816	-0.25842	-0.041252
Sesamum	-0.045756	0.37079	-0.015647	0.088431	-0.11095	0.33784	0.44832	0.62186	-0.11878
Cicer	-0.092224	0.091987	-0.019678	0.65789	0.39972	0.12826	-0.25557	0.47724	0.20033	0.1944
Lupinus	0.05358	-0.2487	0.21977	-0.15955	0.14533	0.25415	-0.34211	0.22285	0.15031	0.2193	-0.060455
Botrytis	0.11475	0.24846	0.12257	-0.27406	-0.58772	-0.20744	0.51114	0.16477	-0.31413	0.36297	-0.32456	-0.00094832
Colletotrichum	-0.075865	-0.10692	0.05358	0.35752	0.60242	-0.068516	-0.40375	-0.25391	0.28402	-0.33262	0.22238	-0.20389	-0.62352
Thielavia	0.025842	-0.57515	-0.098388	0.13158	0.44286	0.21432	-0.45258	-0.18753	0.1266	-0.36605	0.079659	0.32006	-0.56567	0.4073
Sugiyamaella	-0.015884	-0.23257	-0.23234	0.15078	0.46112	0.16121	-0.30654	-0.091987	0.069701	-0.32172	0.34756	-0.11024	-0.6055	0.44998	0.47345
Aspergillus	0.38359	-0.26008	-0.098625	0.10763	0.36629	0.062352	-0.03817	0.21385	-0.015173	-0.042674	-0.016358	0.38217	-0.13016	0.12921	0.40114	0.1624
Pochonia	0.037696	-0.037459	-0.19606	0.21456	-0.14248	0.025367	0.41062	0.20175	0.23376	0.20436	0.05358	0.05358	0.28853	-0.22451	-0.11024	-0.11404	0.34708
Neurospora	-0.084163	-0.211	0.050261	0.34021	0.60242	-0.24988	-0.21977	-0.11285	0.34661	-0.26126	0.21479	0.0049787	-0.35254	0.47819	0.266	0.17591	0.43789	0.22617
Scheffersomyces	0.38265	0.18184	-0.19251	0.53295	-0.045282	-0.15292	0.24395	0.28426	0.066145	0.11664	0.22404	-0.26743	0.24941	0.17188	-0.25699	-0.13276	0.23945	0.47321	0.2596
Fusarium	0.29445	-0.3881	0.048127	0.19986	0.19749	-0.029635	-0.045756	0.03651	-0.053343	-0.16145	-0.10384	0.25486	0.029872	0.11451	0.29208	0.05761	0.72736	0.45282	0.43006	0.38691
Cryptococcus	0.19725	0.10858	0.045282	0.26577	-0.39047	-0.23542	0.26577	0.32006	-0.10835	0.16596	0.0052157	-0.029161	0.5652	-0.50925	-0.42793	-0.47463	0.017781	0.38905	-0.064486	0.47606	0.29659
Ustilago	-0.09009	-0.050261	0.4348	-0.32551	-0.009009	0.097202	-0.15789	-0.15789	-0.33973	-0.010194	-0.35894	0.47202	0.23115	-0.36747	-0.033902	-0.39877	-0.019915	-0.2238	-0.19986	-0.29943	0.070175	0.068042
Malassezia	0.027027	-0.0061641	-0.33073	0.39592	0.26624	0.17757	-0.083215	0.3606	0.023471	-0.024893	0.62091	-0.20768	-0.42058	0.18065	0.1432	0.3779	0.20365	0.0023708	0.13774	0.20555	-0.080133	-0.034139	-0.36629
T	-0.49896	-0.2062	0.49612	-0.1315	0.076125	-0.00166	-0.23229	-0.44015	0.093555	-0.18593	-0.10826	0.0048616	-0.072331	0.080157	0.06569	-0.057864	-0.57034	-0.34505	0.014703	-0.44335	-0.16956	-0.15853	0.36746	-0.47501
RH	0.12673	0.38944	-0.11973	0.072501	-0.17573	-0.020528	-0.054939	0.1043	-0.094927	-0.044023	0.32074	-0.52091	-0.012697	0.10549	-0.36286	0.05221	-0.30519	-0.30009	-0.27387	0.19377	-0.47476	-0.040937	-0.31694	0.36167	-0.23418
P	0.32675	-0.24483	-0.038769	-0.19337	-0.0033197	0.29735	-0.28051	0.043393	-0.16468	0.038414	0.036754	0.28241	-0.021815	-0.17381	0.14239	0.09805	0.30814	-0.24661	-0.23961	-0.17334	0.11109	0.039244	0.10955	0.22787	-0.26975	0.10954
CR	-0.017365	0.36455	-0.23351	0.49264	-0.093971	-0.16836	0.21824	0.27341	0.15013	-0.0011084	0.26282	-0.29497	0.10567	0.10469	-0.25494	0.11491	0.031898	0.42847	0.041382	0.59794	0.044091	0.26221	-0.36665	0.25876	-0.39226	0.36221	-0.3114
WS	0.070611	-0.23533	0.03133	-0.10253	-0.066576	-0.014359	0.3152	0.08141	0.017208	0.18252	-0.24459	0.16258	0.39079	-0.27188	-0.11808	-0.30167	0.027888	0.39032	0.1017	0.12057	0.30167	0.3063	0.22216	-0.25811	0.091465	-0.55904	-0.095015	-0.12823
PM10	0.29854	-0.24435	-0.25372	-0.22906	-0.023949	0.32675	-0.25787	-0.25502	-0.20487	-0.25597	-0.080028	-0.046357	-0.49072	0.17132	0.34228	0.12484	-0.016361	-0.56885	0.014702	-0.25858	-0.12176	-0.31181	0.018733	0.058332	0.07768	0.13179	0.33007	-0.42627	-0.32861
